# Supplementary material
Source: Springer Nature journal article supplement (https://www.springermedizin.de/resource/supplementary/12967_2011_1056_MOESM3_ESM.pdf/9573672)

A

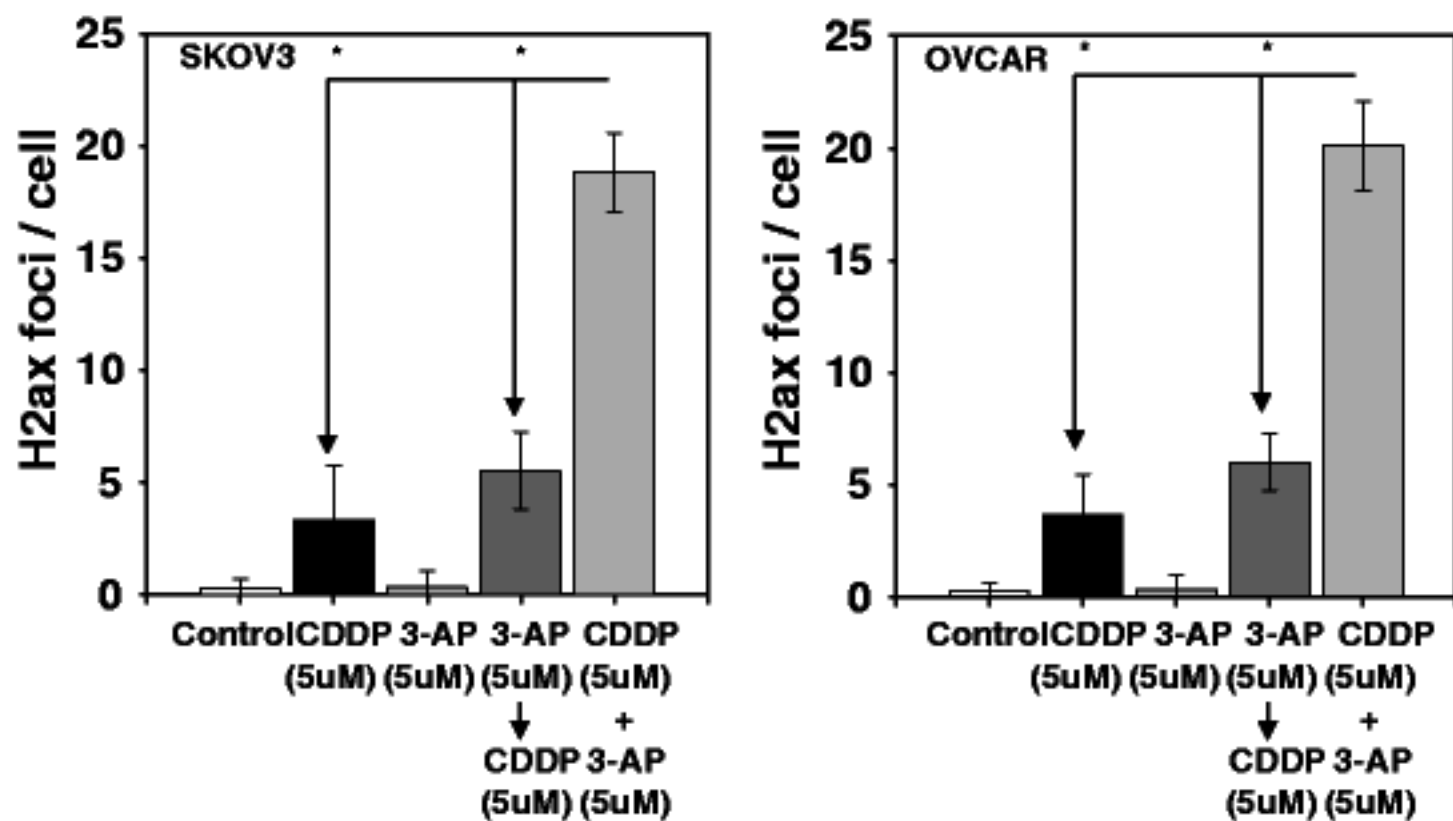

B

SKOV3: 24 hours after start of cisplatin exposure

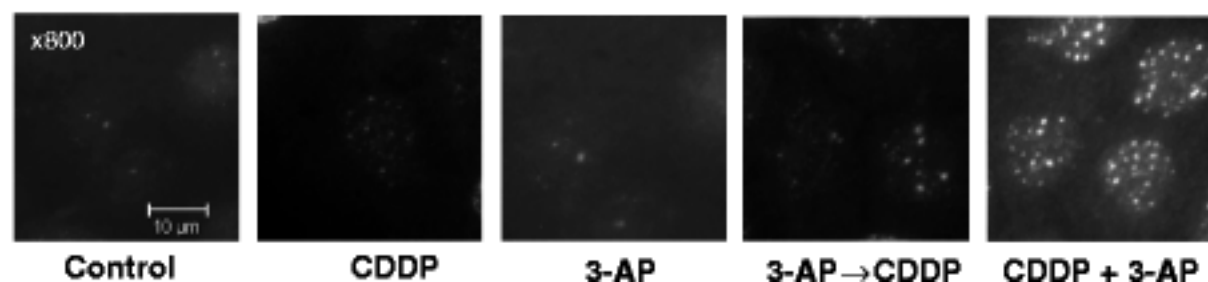

Supplement: MOESM3 [file 9573672]
